# Supplementary material for: Folic Acid Functionalized Diallyl Trisulfide–Solid Lipid Nanoparticles for Targeting Triple Negative Breast Cancer
Source: MDPI journal article supplement (doi:10.3390/molecules28031393), 2023-02-01
Supplement: s1 [file s1]

**Supplementary File**

# **Folic Acid Functionalized Diallyl Trisulfide–Solid Lipid Nanoparticles for Targeting Triple Negative Breast Cancer**

**Anindita De <sup>1,\*</sup>, Parikshit Roychowdhury <sup>2</sup>, Nihar Ranjan Bhuyan <sup>2</sup>, Young Tag Ko <sup>1</sup>, Sachin Kumar Singh <sup>3</sup>, Kamal Dua <sup>4,5</sup> and Gowthamarajan Kuppasamy <sup>6,\*</sup>**

<sup>1</sup> College of Pharmacy, Gachon Institute of Pharmaceutical Science, Gachon University, Incheon 21936, Republic of Korea

<sup>2</sup> Department of Pharmaceutical Chemistry, Himalayan Pharmacy Institute, Majitar 737136, East Sikkim, India

<sup>3</sup> School of Pharmaceutical Sciences, Lovely Professional University, Phagwara 144411, Punjab, India

<sup>4</sup> Faculty of Health, Australian Research Centre in Complementary & Integrative Medicine, University of Technology Sydney, Ultimo, NSW 2007, Australia

<sup>5</sup> Discipline of Pharmacy, Graduate School of Health, University of Technology Sydney, Ultimo, NSW2007, Australia

<sup>6</sup> Department of Pharmaceutics, JSS College of Pharmacy, JSS Academy of Higher Education & Research, Ooty, Nilgiris 643001, Tamil Nadu, India

\* Correspondence: aninditanirupa@gmail.com (A.D.); gowthamsang@jssuni.edu.in (G.K.); Tel.: +82-1098218750 (A.D.); +91-9443089812 (G.K.)

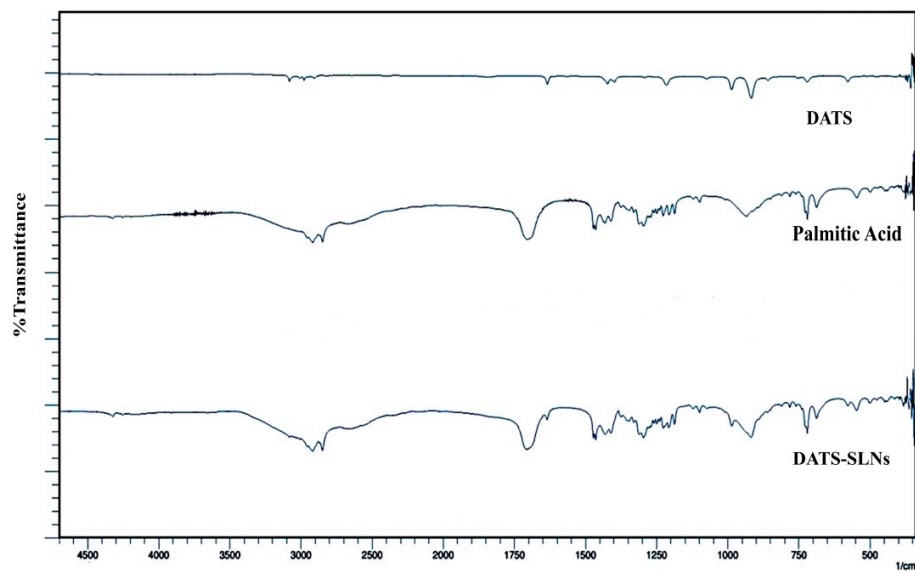

Figure S1. Compatibility study of the lipid Palmitic acid with drug DATS in DATS-SLNs formulation.

Table S1. BBD model for the DATS-SLNs dependent and independent parameters.

| Std. Order | Run | Block | Factor 1 A: Lipid (mg) | Factor 2 B: Surfactant (%) | Factor 3 C: Co.surfactant (%) | Response 1: PS (nm) | Response 2: EE (%) |
|------------|-----|-------|------------------------|----------------------------|-------------------------------|---------------------|--------------------|
| 9          | 1   | 1     | 75                     | 1.5                        | 0.25                          | 216.25              | 40.27              |
| 4          | 2   | 1     | 100                    | 2.5                        | 0.5                           | 148.3               | 55.89              |
| 15         | 3   | 1     | 75                     | 2                          | 0.5                           | 174.1               | 57.32              |
| 11         | 4   | 1     | 75                     | 1.5                        | 0.75                          | 149.5               | 60.18              |
| 17         | 5   | 1     | 75                     | 2                          | 0.5                           | 166.4               | 63.12              |
| 1          | 6   | 1     | 50                     | 1.5                        | 0.5                           | 106.29              | 73.2               |
| 6          | 7   | 1     | 100                    | 2                          | 0.25                          | 188.12              | 59.52              |

|    |    |   |     |     |      |        |       |
|----|----|---|-----|-----|------|--------|-------|
| 5  | 8  | 1 | 50  | 2   | 0.25 | 140.12 | 58.7  |
| 12 | 9  | 1 | 75  | 2.5 | 0.75 | 192.36 | 47.4  |
| 3  | 10 | 1 | 50  | 1.5 | 0.5  | 106.29 | 73.2  |
| 2  | 11 | 1 | 100 | 1.5 | 0.5  | 202.62 | 50.71 |
| 10 | 12 | 1 | 75  | 2.5 | 0.25 | 117.51 | 46.34 |
| 13 | 13 | 1 | 75  | 2   | 0.5  | 167.23 | 54.36 |
| 16 | 14 | 1 | 75  | 2   | 0.5  | 169.41 | 60.79 |
| 7  | 15 | 1 | 50  | 1.5 | 0.5  | 106.29 | 73.2  |
| 8  | 16 | 1 | 100 | 2   | 0.75 | 214.85 | 67    |
| 14 | 17 | 1 | 75  | 2   | 0.5  | 166.4  | 60.79 |

**Table S2.** Analysis of variance (ANOVA) for response surface quadratic model for DATS-SLNs PS.

|                 | F value     | <i>p</i> Value<br>Prob > F | Remarks                   |
|-----------------|-------------|----------------------------|---------------------------|
| Quadratic model |             |                            | Significant ( $p < .05$ ) |
| A-Lipid         | 326.1461617 | <.0001                     |                           |
| B-Surfactant    | 1800.434914 | <.0001                     |                           |
| C-Co surfactant | 198.3049652 | <.0001                     |                           |
| AB              | 1.995245264 | 0.1326                     |                           |
| AC              | 79.17655501 | <.0001                     |                           |
| BC              | 102.6474495 | <.0001                     |                           |
| A <sup>2</sup>  | 749.8825748 | <.0001                     |                           |
| B <sup>2</sup>  | 166.0984932 | <.0001                     |                           |
| C <sup>2</sup>  | 115.785255  | <.0001                     |                           |
| Residual        | 111.0032407 | <.0001                     |                           |
| Lack of fit     | 0.132330929 | 0.8424                     | Not significant           |

**Table S3.** Analysis of variance (ANOVA) for response surface quadratic model for DATS-SLNs %EE.

|                 | <b>F value</b> | <b><i>p</i> Value<br/>Prob &gt; F</b> |                               |
|-----------------|----------------|---------------------------------------|-------------------------------|
| Quadratic model | 17.51924       | 0.0008                                | Significant ( <i>p</i> < .05) |
| A-Lipid         | 13.88987       | 0.009                                 |                               |
| B-Surfactant    | 1.999535       | 0.1463                                |                               |
| C-Co surfactant | 32.18754       | 0.0006                                |                               |
| AB              | 8.798451       | 0.022                                 |                               |
| AC              | 5.124361       | 0.062                                 |                               |
| BC              | 12.47919       | 0.0143                                |                               |
| A^2             | 35.21838       | 0.0008                                |                               |
| B^2             | 46.61263       | 0.0003                                |                               |
| C^2             | 0.817536       | 0.0078                                |                               |
| Residual        |                |                                       |                               |
| Lack of fit     | 0.34651        | 0.7101                                | Not significant               |

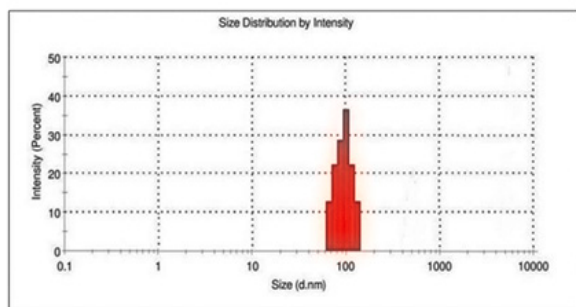

**Figure S2.** Particle size distribution of DATS-SLNs.

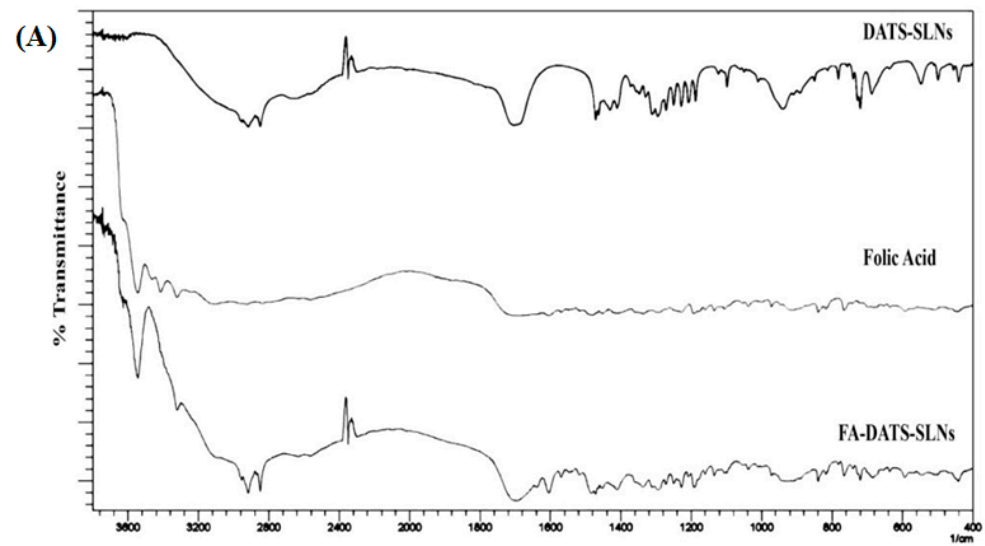

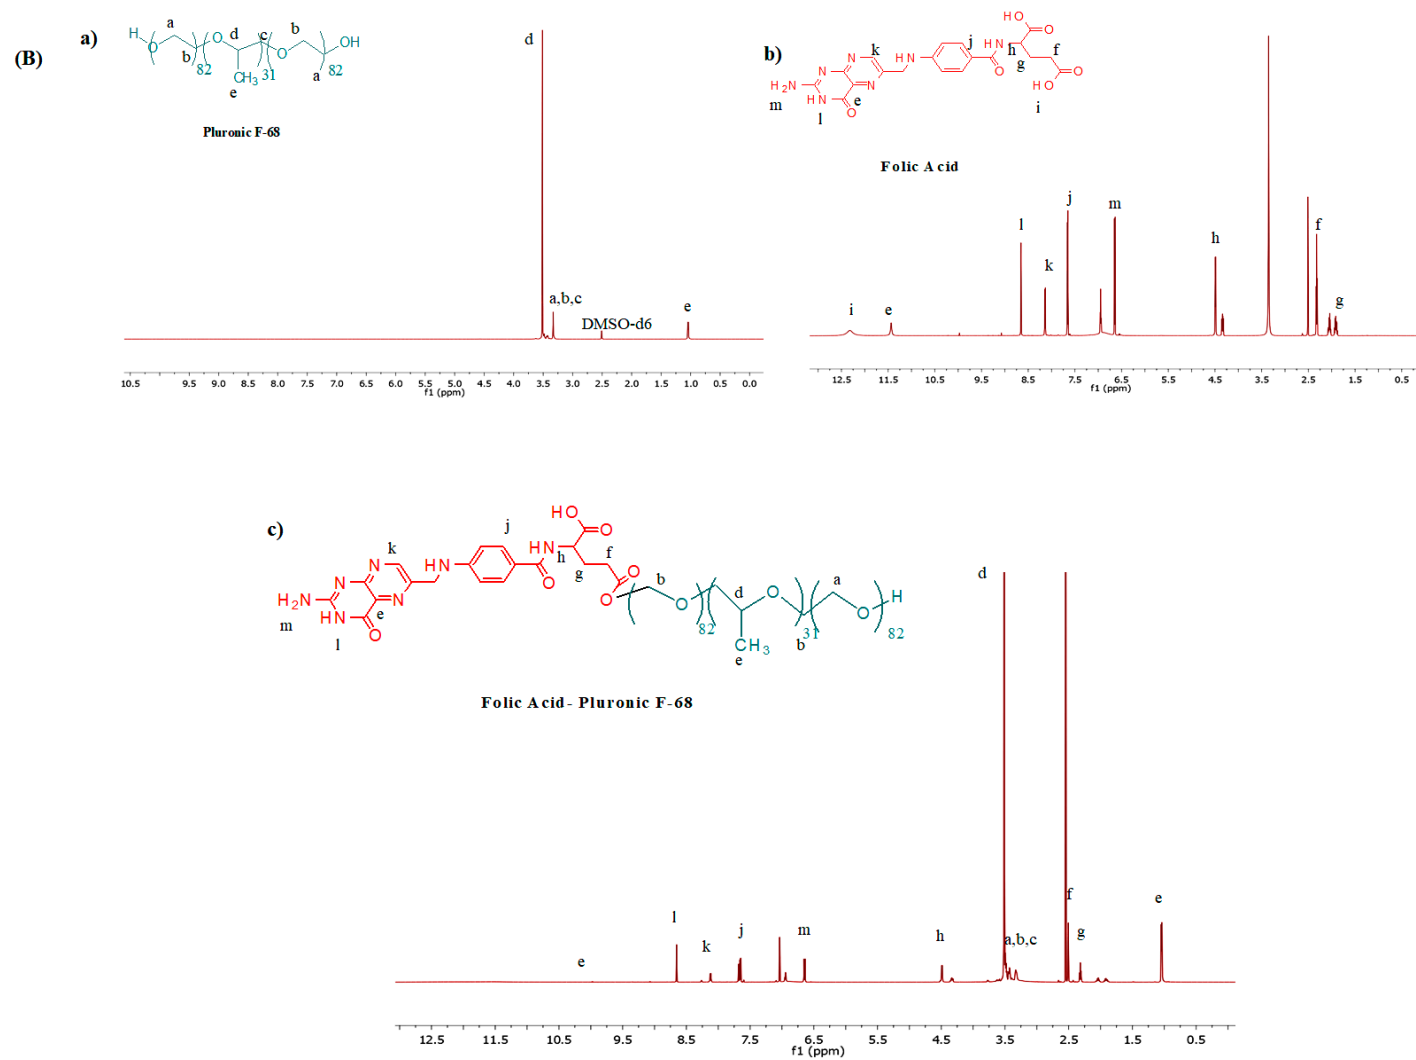

**Figure S3. A:** FTIR conformation of the FA functionalization on the surface of DATS-SLNs. **B.** The NMR spectrum of Pluronic F68, Folic acid and FA-Pluronic F68 for conjugation conformation.

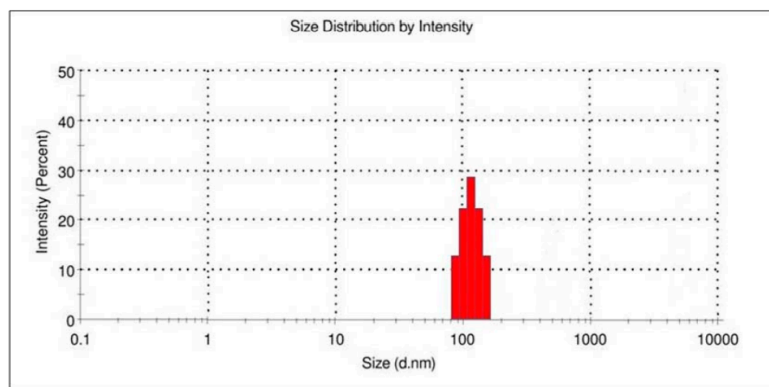

**Figure S4.** Particle size distribution of FA-DATS- SLNs .

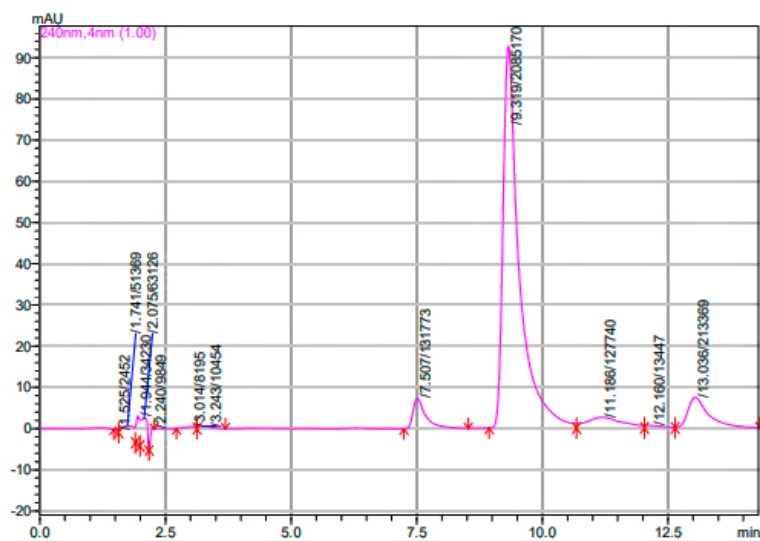

**Figure S5.** UFLC chromatogram of DATS using mobile phase of acetonitrile and water (75:25, v/v), flow rate of 1.1 ml/min, C18 (250 mm 4.6 mm) column. The retention time of the DATS was observed at 9.3.
